# Supplementary material
Source: PubMed Central journal article supplement (PMC8559258)
Supplement: NIHMS1749610-supplement-1.pdf [file NIHMS1749610-supplement-1.pdf]

12  
13  
14 **Supplementary Figure 1. Study flow.** Abbreviations: NL=normal oral glucose tolerance and  
15 IHTG content; SAT= subcutaneous adipose tissue.  
16  
17  
18  
19

20 **Supplementary Figure 2. Collagen gene expression in subcutaneous adipose tissue is**  
21 **greater in people with obesity and NAFLD.** Expression of genes encoding for individual  
22 collagen isoforms in subcutaneous abdominal adipose tissue in the Lean-normal (NL;  $n=12$ ),  
23 Obese-normal (Ob-NL;  $n=21$ ) and Obese-NAFLD (Ob-NAFLD;  $n=24$ ) groups. Data are means  $\pm$   
24 SEM. One-way analysis of variance (ANOVA) and Fisher's least significant difference post-hoc  
25 testing where appropriate were used to identify significant mean differences between groups.  
26  
27  
28  
29  
30  
31  
32  
33 \* $P<0.05$  vs. Lean-NL. † $P<0.05$  vs. Ob-NL.  
34  
35  
36  
37  
38  
39  
40  
41  
42  
43  
44  
45  
46  
47  
48  
49  
50  
51  
52  
53  
54  
55  
56  
57  
58  
59  
60

Supplementary Figure 1

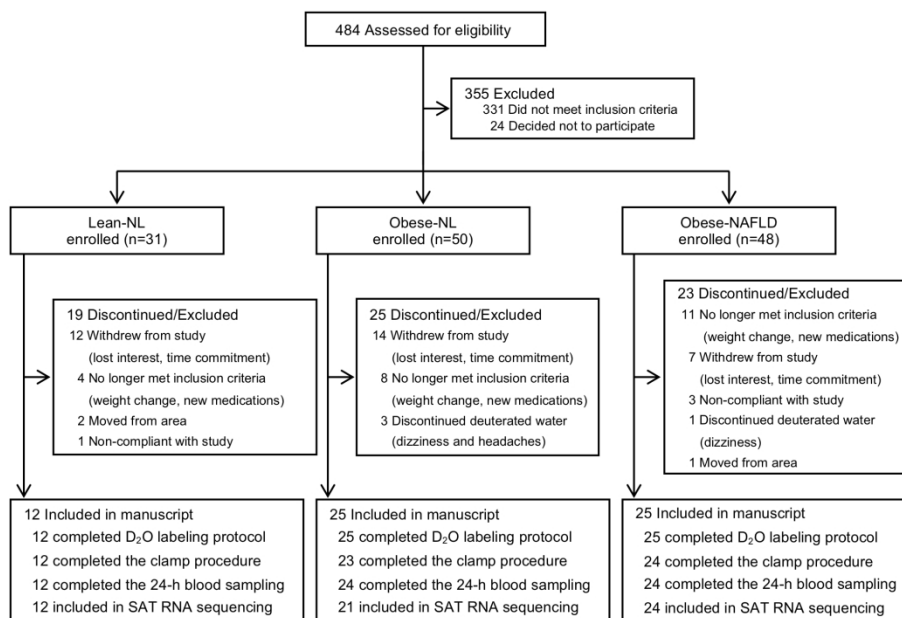

177x228mm (300 x 300 DPI)

1  
2  
3  
4  
5  
6  
7  
8  
9  
10  
11  
12  
13  
14  
15  
16  
17  
18  
19  
20  
21  
22  
23  
24  
25  
26  
27  
28  
29  
30  
31  
32  
33  
34  
35  
36  
37  
38  
39  
40  
41  
42  
43  
44  
45  
46  
47  
48  
49  
50  
51  
52  
53  
54  
55  
56  
57  
58  
59  
60

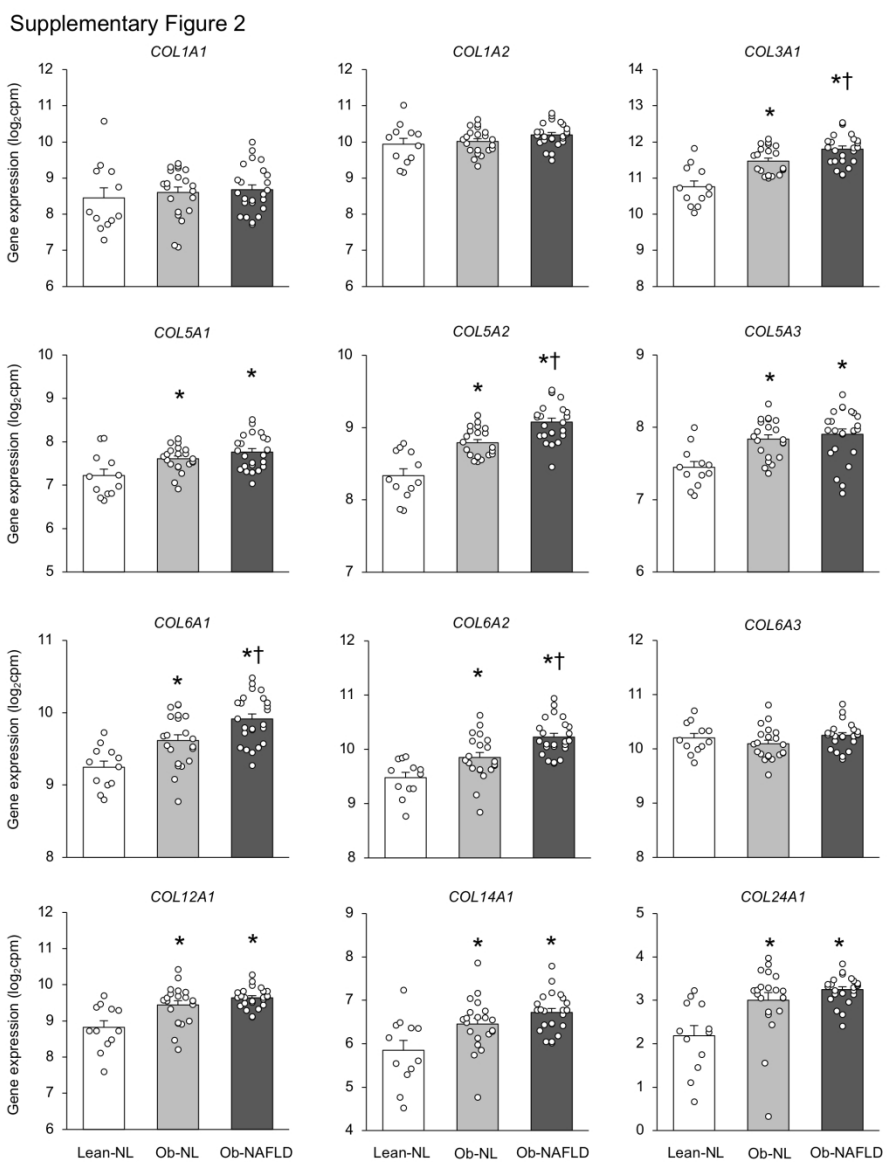

177x228mm (300 x 300 DPI)
